# Supplementary material
Source: PubMed Central journal article supplement (PMC5449263)
Supplement: NIHMS838264-supplement-Supplementary_Figures.pdf [file NIHMS838264-supplement-Supplementary_Figures.pdf]

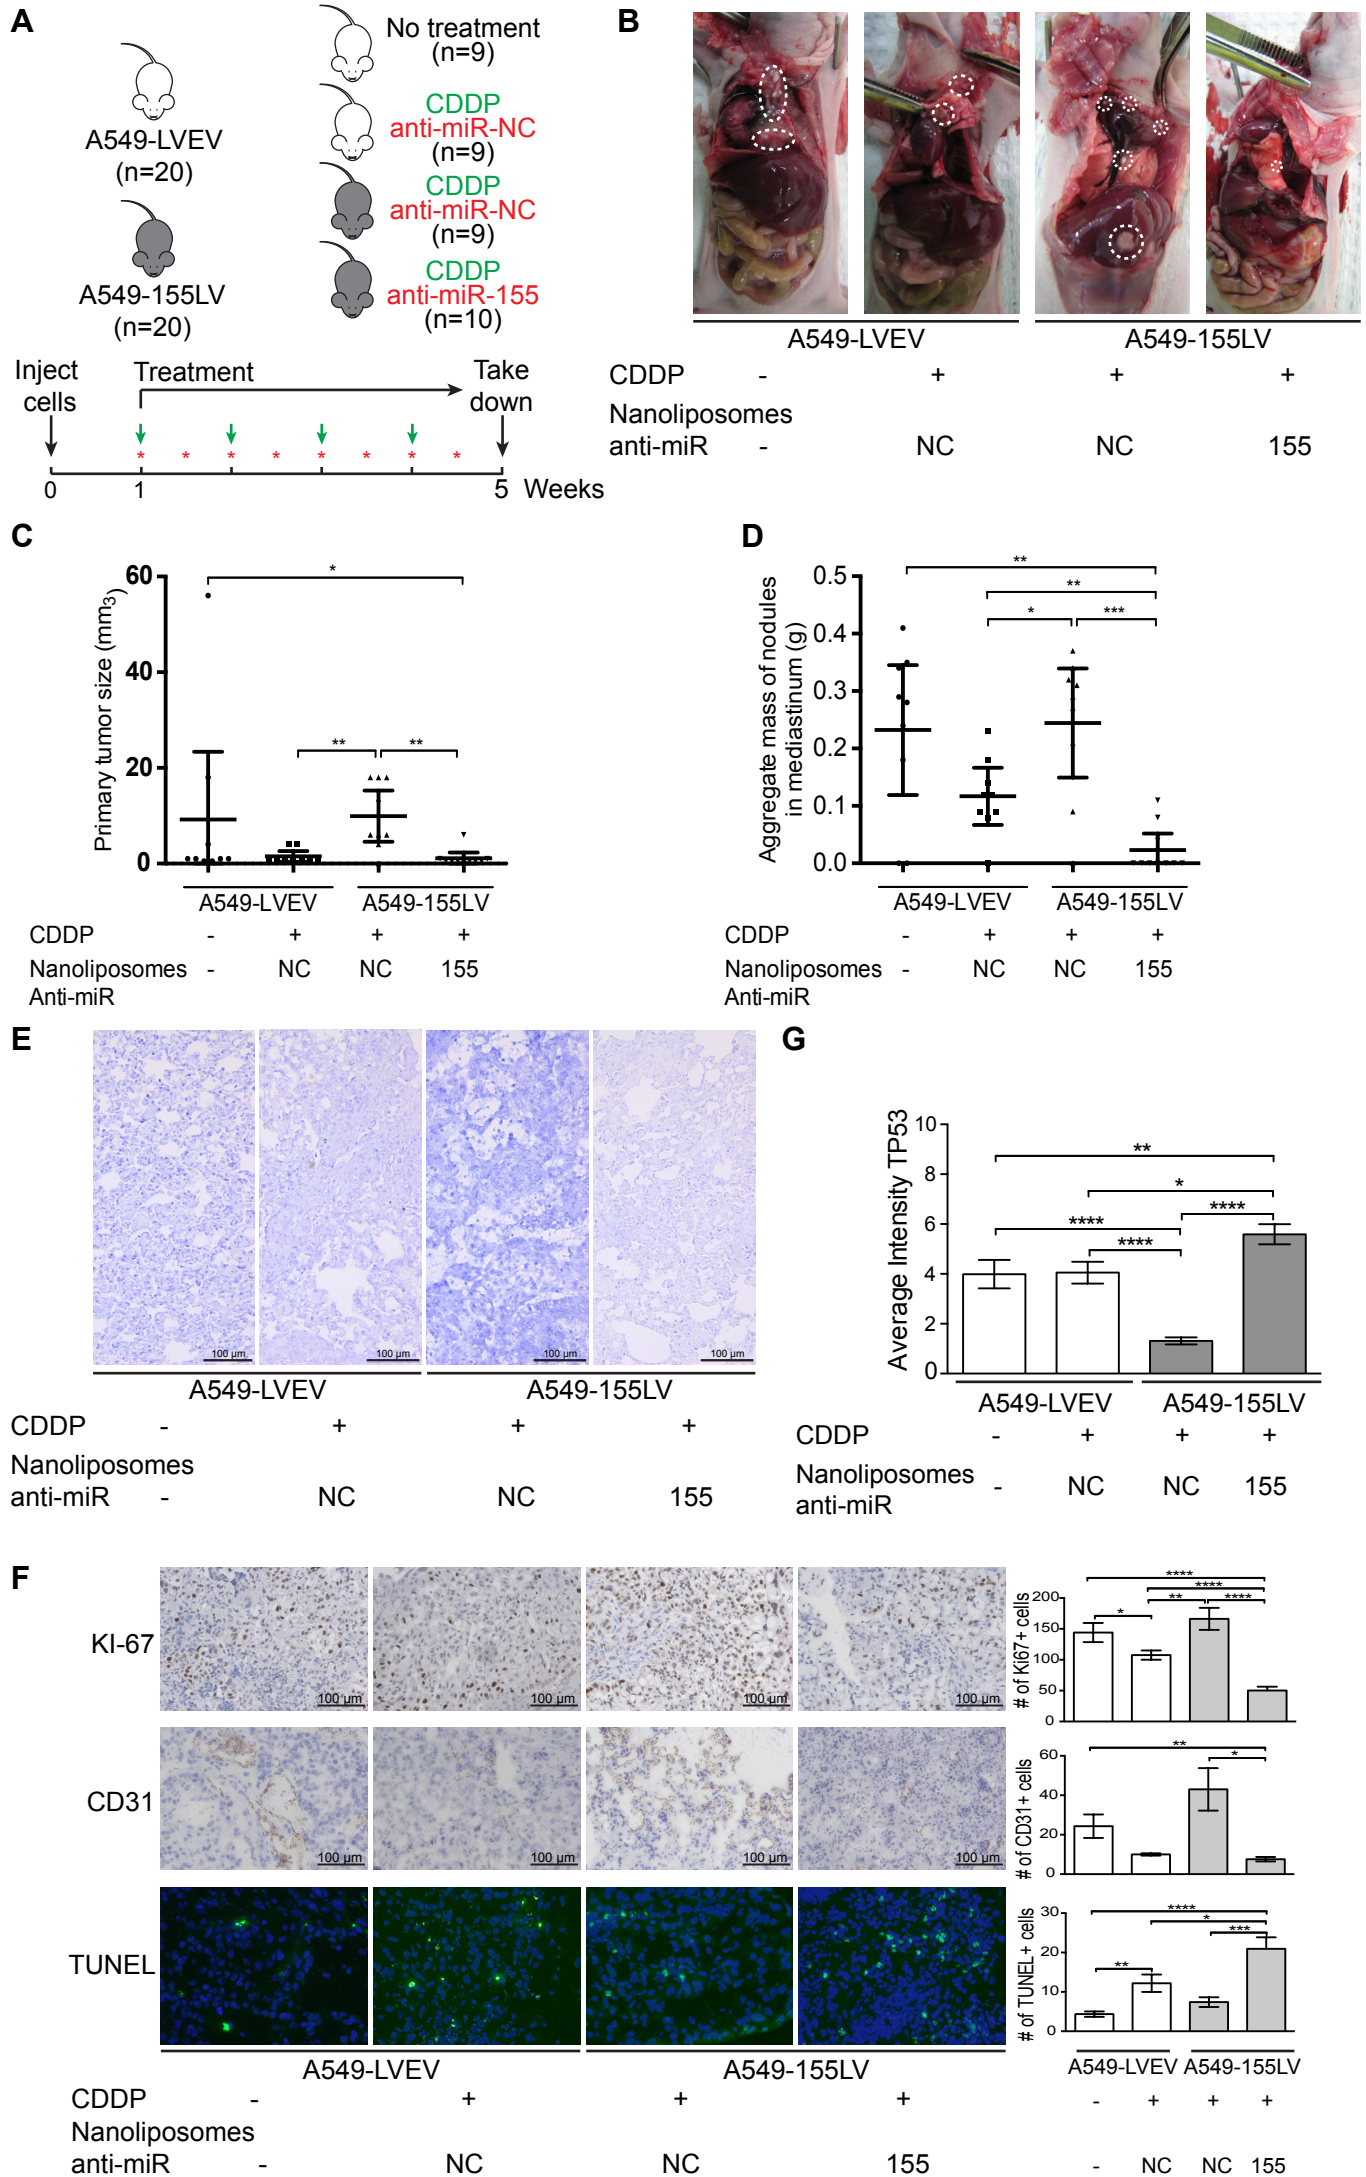

**Supplementary Figure S1 *In vivo* orthotopic lung cancer model for the role of miR-155 in chemoresistance.** (A) Injection and treatment schedule for CDDP (green arrows) and anti-miR negative control (NC) or anti-miR-155 liposomal nanoparticles (red stars) for four different treatment groups: mice that were injected with A549-LVEV cells and untreated (group 1), injected with A549-LVEV cells and treated with anti-miR-NC and CDDP (group 2), injected with A549-155LV cells and treated with anti-miR-NC and CDDP (group 3), and injected with A549-155LV cells and treated with anti-miR-155 and CDDP (group 4). (B) Representative pictures of dissected mice belonging to each of the treatment groups described in panel A of this Figure. Tumor nodules are marked by dotted white circles. (C-D) Graphs of the primary tumor size (C) and aggregate mass of nodules in mediastinum (D) of the four treatment groups mentioned above. (E) *In situ* hybridization for miR-155 for each of the four treatment groups mentioned above. CDDP, cisplatin; LVEV, lentivirus empty vector; LV, lentivirus; NC, negative control. Error bars represent SEM. The number of mice in each group is indicated.

## MEC1 Fludarabine 48h

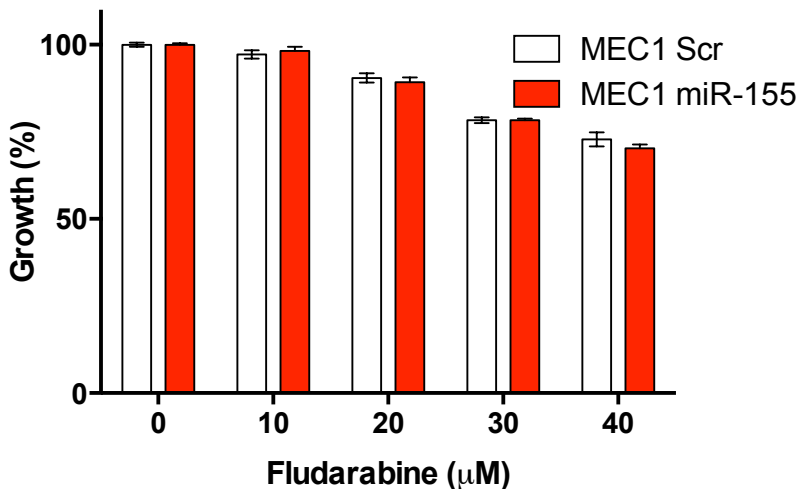

## MEC2 Fludarabine 48h

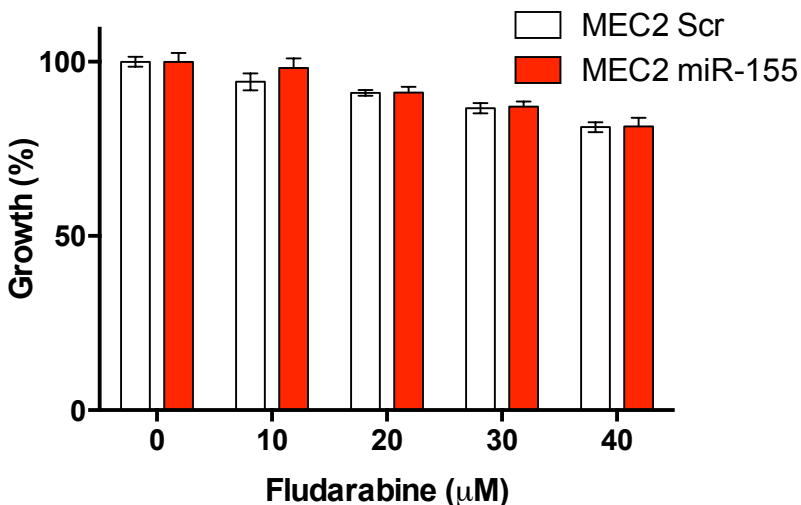

**Supplementary Figure S2 Proliferation curves for MEC1 and MEC2 cells treated with fludarabine.** Error bars represent SEM, and each assay was performed twice.

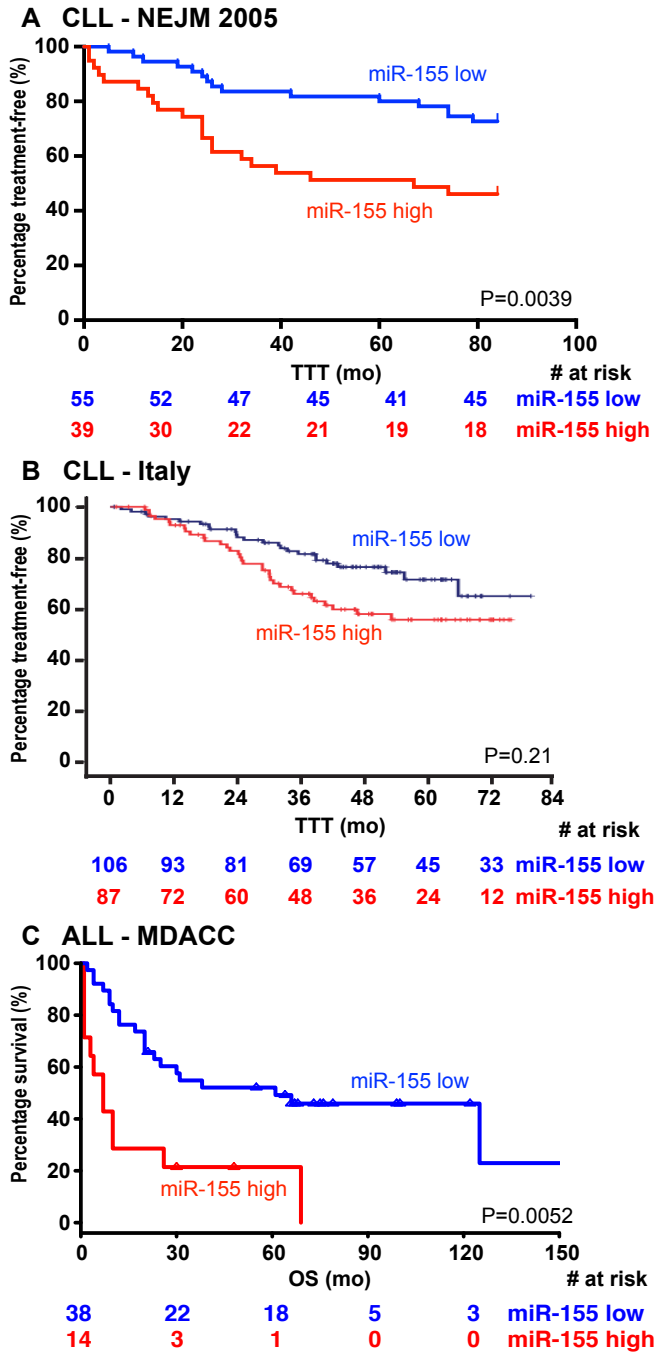

**Supplementary Figure S3 Clinical correlation of miR-155 expression with survival in leukemia.** Kaplan-Meier survival analysis for patients expressing high levels of miR-155 vs. low levels of miR-155 in two CLL cohorts, CLL – NEJM (A) and CLL – Italy (B), and in one ALL cohort, ALL – MDACC (C). The red and blue values below the Kaplan-Meier survival curves represent patients at risk at the specified time points. TTT, time-to-treatment; OS, overall survival; mo, months.
